# Supplementary material
Source: PubMed Central journal article supplement (PMC9741946)
Supplement: NIHMS1853170-supplement-1.pdf [file NIHMS1853170-supplement-1.pdf]

# Appendix for: *Buprenorphine & methadone dosing strategies to reduce risk of relapse in the treatment of opioid use disorder*

## A1 Inclusion/Exclusion criteria

We use data harmonized across three large randomized trials for OUD treatment that were part of the NIDA Clinical Trials Network (CTN): CTN0027,<sup>1,2</sup> which randomized 1,269 participants to either BUP-NX or methadone, conducted 2006-2010; Phase 2 of CTN0030,<sup>3</sup> which randomized 360 participants to BUP-NX and standard medical management vs. BUP-NX and individual drug counseling, conducted 2006-2009; and CTN0051,<sup>4</sup> which randomized 570 participants to either extended release naltrexone or BUP-NX, conducted 2014-2017 (we exclude the extended release naltrexone arm of this trial). All included patient treatment and monitoring over 12 weeks.

All three trials enrolled adult participants over age 18 who met DSM-IV-TR criteria for opioid dependence or DSM-5 diagnosis of OUD. Consistent with the goals of the CTN,<sup>5</sup> the trials were broadly inclusive to treatment-seeking OUD patients and were conducted in community-based treatment programs across the US. Individuals were excluded if they had major medical and unstable psychiatric co-morbidities or were pregnant or planning to get pregnant. CTN0027 and CTN0051 included patients currently using all types of opioids, predominantly heroin users, while CTN0030 was restricted to those currently using prescription opioids and not currently using heroin. CTN0027 included patients who presented for treatment at methadone clinics, CTN0030 included patients who presented for office-based treatment, and CTN0051 included patients who presented for short-term inpatient treatment.

## A2 Analytic Details

- $d(L_{t-1}) = 1$  denotes increased dose at week  $t$  in response to the values  $L_{t-1}$ . Let  $d1$  denote the first treatment strategy of increasing dose in response to use:  $d1(L_{t-1}) = 1$  if there was sub-threshold illicit opioid use and if dose was below the observed maximum ( $< 32\text{mg}$  for BUP-NX,  $< 397\text{mg}$  for methadone) and at time  $t - 1$ , and  $d1(L_{t-1}) = 0$  otherwise.
- Let  $d2$  denote the second strategy of increasing dose until a minimum threshold is reached:  $d2(L_{t-1}) = 1$  if BUP-NX dose was  $< 16\text{mg}$  or methadone dose was  $< 100\text{mg}$  at time  $t - 1$ , and  $d2(L_{t-1}) = 0$  otherwise.
- Let  $d3$  denote the hybrid strategy:  $d3(L_{t-1}) = 1$  if i) BUP-NX dose was  $< 16\text{mg}$  or methadone dose was  $< 100\text{mg}$  or if ii) there was sub-threshold illicit opioid use and if dose was below the observed maximum at time  $t - 1$ , and  $d3(L_{t-1}) = 0$  otherwise.
- Let  $d4$  denote the strategy of holding dose constant:  $d4(L_{t-1}) = 0$ .

Figure A1: Directed acyclic graph depicting the longitudinal data. Nodes at timepoints  $t \in \{4-10\}$  are omitted for readability. L2 includes baseline covariates and time-varying covariates at week 1;  $L_t$  for  $t \in \{3-11\}$  includes time-varying covariates of use and dose at time  $t-1$  and relapse at time  $t$ ;  $A_t$  for  $t \in \{2-11\}$  denotes whether or not a dose increase happened at time  $t$ . All nodes are affected by all previous nodes. Pink lines denote relationships that contribute to the longitudinal effect estimate.

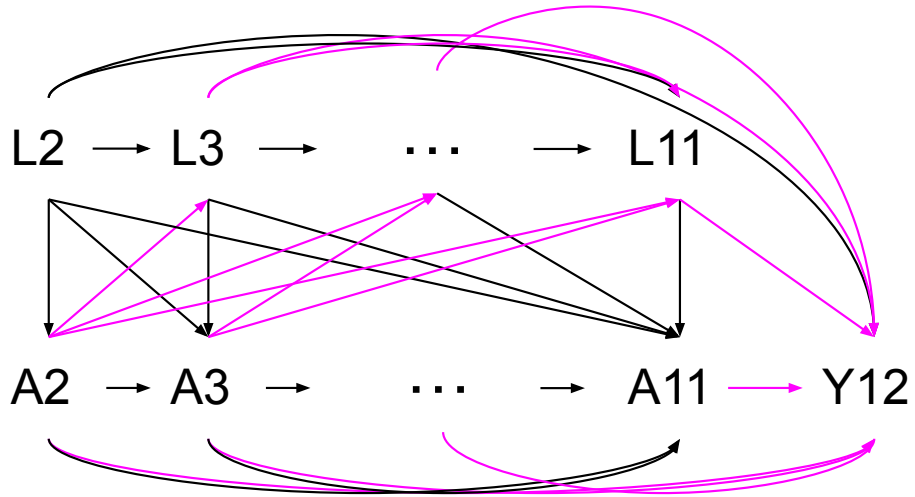

Table A1: Effect estimates on the additive scale (risk differences, RD) and multiplicative scale (risk ratios, RR) and their 95% confidence intervals (CIs) comparing dosing strategies {d1, d2, d3} to the constant dose strategy d4 on risk of relapse across weeks 3-12 of treatment. Effect estimates given separately for BUP-NX treatment and for methadone treatment.

| Wk.              | BUP-NX       |              |              |            | Methadone    |              |              |            |  |
|------------------|--------------|--------------|--------------|------------|--------------|--------------|--------------|------------|--|
|                  | RD           |              | RR           |            | RD           |              | RR           |            |  |
|                  | $\hat{\psi}$ | 95% CI       | $\hat{\psi}$ | 95% CI     | $\hat{\psi}$ | 95% CI       | $\hat{\psi}$ | 95% CI     |  |
| <b>d1 vs. d4</b> |              |              |              |            |              |              |              |            |  |
| 3                | 0.00         | -0.02, 0.02  | 1.03         | 0.71, 1.36 | 0.01         | -0.03, 0.06  | 1.13         | 0.74, 1.52 |  |
| 4                | -0.13        | -0.16, -0.10 | 0.49         | 0.26, 0.72 | -0.16        | -0.21, -0.11 | 0.47         | 0.24, 0.69 |  |
| 5                | -0.11        | -0.14, -0.07 | 0.63         | 0.46, 0.80 | -0.12        | -0.18, -0.06 | 0.58         | 0.33, 0.83 |  |
| 6                | -0.04        | -0.08, -0.00 | 0.90         | 0.79, 1.00 | -0.08        | -0.14, -0.02 | 0.84         | 0.71, 0.96 |  |
| 7                | -0.07        | -0.11, -0.03 | 0.84         | 0.74, 0.95 | -0.09        | -0.14, -0.04 | 0.82         | 0.71, 0.93 |  |
| 8                | -0.04        | -0.08, 0.00  | 0.91         | 0.81, 1.01 | -0.10        | -0.16, -0.04 | 0.82         | 0.71, 0.93 |  |
| 9                | -0.03        | -0.08, 0.03  | 0.94         | 0.82, 1.07 | -0.14        | -0.19, -0.09 | 0.77         | 0.67, 0.87 |  |
| 10               | -0.05        | -0.10, 0.00  | 0.90         | 0.79, 1.01 | -0.10        | -0.16, -0.05 | 0.83         | 0.73, 0.93 |  |
| 11               | -0.04        | -0.09, 0.02  | 0.93         | 0.82, 1.04 | -0.10        | -0.16, -0.04 | 0.84         | 0.73, 0.95 |  |
| 12               | -0.04        | -0.09, 0.01  | 0.93         | 0.82, 1.03 | -0.10        | -0.15, -0.05 | 0.84         | 0.74, 0.93 |  |
| <b>d2 vs. d4</b> |              |              |              |            |              |              |              |            |  |
| 3                | 0.00         | -0.01, 0.01  | 1.01         | 0.84, 1.17 | 0.00         | -0.04, 0.05  | 1.04         | 0.61, 1.48 |  |
| 4                | -0.07        | -0.09, -0.06 | 0.71         | 0.64, 0.79 | -0.17        | -0.22, -0.12 | 0.42         | 0.13, 0.71 |  |
| 5                | -0.06        | -0.08, -0.04 | 0.79         | 0.72, 0.86 | -0.14        | -0.20, -0.07 | 0.52         | 0.22, 0.82 |  |
| 6                | -0.04        | -0.06, -0.02 | 0.89         | 0.85, 0.94 | -0.09        | -0.15, -0.03 | 0.82         | 0.68, 0.96 |  |
| 7                | -0.05        | -0.07, -0.03 | 0.89         | 0.84, 0.93 | -0.10        | -0.17, -0.04 | 0.80         | 0.67, 0.93 |  |
| 8                | -0.04        | -0.06, -0.01 | 0.92         | 0.87, 0.97 | -0.10        | -0.16, -0.04 | 0.82         | 0.70, 0.95 |  |
| 9                | -0.03        | -0.06, -0.01 | 0.93         | 0.88, 0.98 | -0.14        | -0.21, -0.08 | 0.76         | 0.64, 0.88 |  |
| 10               | -0.04        | -0.06, -0.02 | 0.92         | 0.88, 0.96 | -0.10        | -0.17, -0.04 | 0.82         | 0.71, 0.94 |  |
| 11               | -0.03        | -0.05, -0.01 | 0.94         | 0.89, 0.98 | -0.11        | -0.17, -0.04 | 0.82         | 0.71, 0.94 |  |
| 12               | -0.03        | -0.05, -0.01 | 0.94         | 0.90, 0.98 | -0.11        | -0.18, -0.05 | 0.82         | 0.70, 0.93 |  |
| <b>d3 vs. d4</b> |              |              |              |            |              |              |              |            |  |
| 3                | 0.00         | -0.02, 0.02  | 1.03         | 0.72, 1.34 | 0.01         | -0.03, 0.06  | 1.13         | 0.71, 1.55 |  |
| 4                | -0.14        | -0.16, -0.11 | 0.46         | 0.29, 0.62 | -0.16        | -0.22, -0.11 | 0.45         | 0.17, 0.73 |  |
| 5                | -0.12        | -0.15, -0.09 | 0.59         | 0.46, 0.72 | -0.12        | -0.18, -0.06 | 0.57         | 0.29, 0.84 |  |
| 6                | -0.07        | -0.09, -0.04 | 0.83         | 0.76, 0.90 | -0.08        | -0.14, -0.01 | 0.84         | 0.71, 0.98 |  |
| 7                | -0.10        | -0.12, -0.07 | 0.77         | 0.71, 0.84 | -0.09        | -0.15, -0.03 | 0.83         | 0.71, 0.94 |  |
| 8                | -0.08        | -0.11, -0.05 | 0.82         | 0.75, 0.90 | -0.09        | -0.15, -0.04 | 0.83         | 0.72, 0.94 |  |
| 9                | -0.07        | -0.10, -0.03 | 0.86         | 0.78, 0.94 | -0.13        | -0.19, -0.07 | 0.78         | 0.68, 0.89 |  |
| 10               | -0.07        | -0.11, -0.04 | 0.86         | 0.78, 0.93 | -0.10        | -0.16, -0.04 | 0.83         | 0.73, 0.93 |  |
| 11               | -0.08        | -0.11, -0.04 | 0.86         | 0.79, 0.93 | -0.10        | -0.16, -0.05 | 0.83         | 0.73, 0.93 |  |
| 12               | -0.07        | -0.10, -0.03 | 0.87         | 0.80, 0.95 | -0.12        | -0.17, -0.07 | 0.80         | 0.71, 0.90 |  |

Table A2: Effect estimates on the additive scale (risk differences, RD) and multiplicative scale (risk ratios, RR) and their 95% confidence intervals (CIs) comparing dosing strategies {d1, d2} to the hybrid dose strategy d3 on risk of relapse across weeks 3-12 of treatment. Effect estimates given separately for BUP-NX treatment and for methadone treatment.

| Wk.              | BUP-NX       |             |              |            | Methadone    |             |              |            |
|------------------|--------------|-------------|--------------|------------|--------------|-------------|--------------|------------|
|                  | RD           |             | RR           |            | RD           |             | RR           |            |
|                  | $\hat{\psi}$ | 95% CI      | $\hat{\psi}$ | 95% CI     | $\hat{\psi}$ | 95% CI      | $\hat{\psi}$ | 95% CI     |
| <b>d1 vs. d3</b> |              |             |              |            |              |             |              |            |
| 3                | -0.00        | -0.00, 0.00 | 1.00         | 0.96, 1.04 | 0.00         | -0.01, 0.01 | 1.00         | 0.93, 1.07 |
| 4                | 0.01         | -0.01, 0.02 | 1.07         | 0.95, 1.19 | 0.01         | -0.01, 0.02 | 1.04         | 0.91, 1.17 |
| 5                | 0.01         | -0.01, 0.03 | 1.07         | 0.97, 1.18 | 0.00         | -0.02, 0.02 | 1.02         | 0.90, 1.13 |
| 6                | 0.03         | 0.00, 0.05  | 1.08         | 1.01, 1.15 | -0.00        | -0.03, 0.03 | 1.00         | 0.92, 1.07 |
| 7                | 0.03         | 0.00, 0.06  | 1.09         | 1.02, 1.17 | -0.00        | -0.03, 0.03 | 0.99         | 0.92, 1.06 |
| 8                | 0.04         | 0.01, 0.07  | 1.11         | 1.05, 1.17 | -0.01        | -0.04, 0.02 | 0.98         | 0.92, 1.05 |
| 9                | 0.04         | -0.00, 0.08 | 1.10         | 1.01, 1.19 | -0.01        | -0.04, 0.02 | 0.98         | 0.91, 1.05 |
| 10               | 0.02         | -0.02, 0.06 | 1.05         | 0.97, 1.13 | -0.00        | -0.03, 0.03 | 1.00         | 0.93, 1.06 |
| 11               | 0.04         | -0.00, 0.08 | 1.09         | 1.00, 1.17 | 0.01         | -0.03, 0.04 | 1.01         | 0.94, 1.08 |
| 12               | 0.03         | -0.01, 0.07 | 1.06         | 0.98, 1.14 | 0.02         | -0.01, 0.06 | 1.04         | 0.97, 1.11 |
| <b>d2 vs. d3</b> |              |             |              |            |              |             |              |            |
| 3                | -0.00        | -0.02, 0.01 | 0.98         | 0.71, 1.24 | -0.01        | -0.02, 0.00 | 0.92         | 0.84, 1.01 |
| 4                | 0.06         | 0.04, 0.08  | 1.56         | 1.40, 1.73 | -0.01        | -0.02, 0.00 | 0.94         | 0.85, 1.03 |
| 5                | 0.06         | 0.04, 0.08  | 1.34         | 1.22, 1.47 | -0.01        | -0.03, 0.00 | 0.92         | 0.80, 1.03 |
| 6                | 0.03         | 0.00, 0.05  | 1.08         | 1.01, 1.15 | -0.01        | -0.04, 0.02 | 0.97         | 0.91, 1.04 |
| 7                | 0.05         | 0.03, 0.07  | 1.15         | 1.09, 1.21 | -0.02        | -0.04, 0.01 | 0.96         | 0.91, 1.02 |
| 8                | 0.04         | 0.02, 0.07  | 1.11         | 1.05, 1.18 | -0.00        | -0.03, 0.02 | 0.99         | 0.94, 1.04 |
| 9                | 0.03         | 0.00, 0.06  | 1.08         | 1.01, 1.14 | -0.01        | -0.05, 0.03 | 0.97         | 0.89, 1.06 |
| 10               | 0.03         | 0.00, 0.06  | 1.07         | 1.01, 1.14 | -0.00        | -0.03, 0.03 | 0.99         | 0.93, 1.05 |
| 11               | 0.04         | 0.01, 0.07  | 1.09         | 1.03, 1.16 | -0.00        | -0.04, 0.04 | 1.00         | 0.92, 1.08 |
| 12               | 0.04         | 0.00, 0.07  | 1.08         | 1.01, 1.14 | 0.01         | -0.03, 0.04 | 1.01         | 0.94, 1.09 |

Table A3: Number of patients randomized to receive BUP-NX and methadone that were observed as having dose increased, but did not increase dose under a given treatment strategy.

|                  | Wk. 2 | 3   | 4  | 5  | 6  | 7  | 8  | 9  | 10 | 11 |
|------------------|-------|-----|----|----|----|----|----|----|----|----|
| <b>BUP-NX</b>    |       |     |    |    |    |    |    |    |    |    |
| Dynamic          | 171   | 99  | 75 | 43 | 37 | 24 | 17 | 14 | 9  | 9  |
| Threshold        | 237   | 125 | 90 | 43 | 38 | 26 | 17 | 15 | 9  | 8  |
| Hybrid           | 136   | 86  | 60 | 33 | 30 | 22 | 13 | 11 | 7  | 6  |
| <b>Methadone</b> |       |     |    |    |    |    |    |    |    |    |
| Dynamic          | 117   | 96  | 79 | 63 | 53 | 41 | 43 | 28 | 30 | 31 |
| Threshold        | 17    | 30  | 37 | 30 | 24 | 24 | 26 | 22 | 22 | 31 |
| Hybrid           | 8     | 16  | 26 | 21 | 18 | 19 | 21 | 18 | 15 | 21 |

Table A4: Proportion of patients randomized to receive BUP-NX and methadone that met components of treatment strategy *eligibility* for having dose increased under a given treatment strategy.

|                      | Wk. 2 | 3    | 4    | 5    | 6    | 7    | 8    | 9    | 10   | 11   |
|----------------------|-------|------|------|------|------|------|------|------|------|------|
| <b>BUP-NX</b>        |       |      |      |      |      |      |      |      |      |      |
| Prior week use       | 0.43  | 0.28 | 0.23 | 0.12 | 0.11 | 0.10 | 0.11 | 0.08 | 0.07 | 0.07 |
| Dose under threshold | 0.84  | 0.70 | 0.64 | 0.55 | 0.52 | 0.49 | 0.47 | 0.44 | 0.42 | 0.41 |
| <i>CTN0027</i>       |       |      |      |      |      |      |      |      |      |      |
| Prior week use       | 0.53  | 0.30 | 0.24 | 0.09 | 0.08 | 0.08 | 0.08 | 0.07 | 0.05 | 0.07 |
| Dose under threshold | 0.74  | 0.53 | 0.47 | 0.37 | 0.34 | 0.33 | 0.30 | 0.28 | 0.27 | 0.26 |
| <i>CTN0030</i>       |       |      |      |      |      |      |      |      |      |      |
| Prior week use       | 0.36  | 0.32 | 0.26 | 0.19 | 0.15 | 0.13 | 0.16 | 0.09 | 0.10 | 0.10 |
| Dose under threshold | 0.93  | 0.86 | 0.82 | 0.72 | 0.69 | 0.66 | 0.64 | 0.61 | 0.59 | 0.59 |
| <i>CTN0051</i>       |       |      |      |      |      |      |      |      |      |      |
| Prior week use       | 0.24  | 0.19 | 0.17 | 0.10 | 0.12 | 0.10 | 0.12 | 0.10 | 0.08 | 0.07 |
| Dose under threshold | 0.99  | 0.91 | 0.86 | 0.79 | 0.75 | 0.71 | 0.67 | 0.63 | 0.60 | 0.58 |
| <b>Methadone</b>     |       |      |      |      |      |      |      |      |      |      |
| Prior week use       | 0.51  | 0.43 | 0.37 | 0.14 | 0.12 | 0.11 | 0.10 | 0.09 | 0.10 | 0.09 |
| Dose under threshold | 0.88  | 0.81 | 0.77 | 0.56 | 0.53 | 0.51 | 0.49 | 0.47 | 0.45 | 0.44 |

Table A5: Maximum density ratio used in the weights of the sequentially doubly robust estimator by medication type, dosing strategy, and week of treatment.

|                  | Wk. 2 | 3    | 4    | 5    | 6    | 7     | 8     | 9     | 10    | 11    |
|------------------|-------|------|------|------|------|-------|-------|-------|-------|-------|
| <b>BUP-NX</b>    |       |      |      |      |      |       |       |       |       |       |
| d4               | 1.45  | 1.39 | 1.27 | 1.23 | 1.11 | 1.08  | 1.07  | 1.04  | 1.03  | 1.07  |
| d1               | 3.21  | 5.67 | 5.21 | 7.88 | 6.98 | 17.61 | 16.62 | 17.61 | 17.61 | 17.61 |
| d2               | 5.01  | 3.91 | 7.40 | 7.07 | 7.40 | 7.02  | 7.40  | 6.07  | 7.40  | 7.35  |
| d3               | 3.44  | 4.11 | 3.60 | 3.44 | 6.40 | 7.36  | 7.73  | 7.73  | 7.73  | 7.73  |
| <b>Methadone</b> |       |      |      |      |      |       |       |       |       |       |
| d4               | 3.73  | 3.20 | 2.21 | 1.82 | 1.55 | 1.40  | 1.28  | 1.25  | 1.21  | 1.29  |
| d1               | 1.81  | 4.31 | 2.18 | 3.94 | 1.51 | 2.96  | 1.01  | 2.62  | 4.31  | 1.01  |
| d2               | 4.46  | 7.27 | 3.96 | 5.10 | 2.03 | 2.36  | 4.29  | 7.75  | 2.36  | 7.75  |
| d3               | 1.68  | 3.91 | 2.56 | 3.91 | 2.20 | 1.51  | 1.95  | 2.19  | 2.12  | 2.25  |

Table A6: Number of patients randomized to receive BUP-NX, stratified by trial, that were observed as following a given strategy: (1) increased dose under the strategy and were observed as increasing dose, or (0) had a constant dose under the strategy and were observed as having a constant dose.

|                                               | Wk. 2 | 3   | 4   | 5   | 6   | 7   | 8   | 9   | 10  | 11  |
|-----------------------------------------------|-------|-----|-----|-----|-----|-----|-----|-----|-----|-----|
| Constant dose strategy, d4                    |       |     |     |     |     |     |     |     |     |     |
| <b>CTN0027</b>                                |       |     |     |     |     |     |     |     |     |     |
| <i>Total</i>                                  | 549   | 569 | 429 | 406 | 325 | 314 | 306 | 281 | 259 | 248 |
| <b>CTN0030</b>                                |       |     |     |     |     |     |     |     |     |     |
| <i>Total</i>                                  | 290   | 320 | 303 | 311 | 277 | 265 | 259 | 253 | 246 | 240 |
| <b>CTN0051</b>                                |       |     |     |     |     |     |     |     |     |     |
| <i>Total</i>                                  | 189   | 220 | 215 | 211 | 199 | 200 | 183 | 176 | 170 | 159 |
| Increase dose in response to use strategy, d1 |       |     |     |     |     |     |     |     |     |     |
| <b>CTN0027</b>                                |       |     |     |     |     |     |     |     |     |     |
| Increase                                      | 92    | 33  | 25  | 13  | 3   | 2   | 2   | 2   | 3   | 1   |
| Constant                                      | 265   | 317 | 296 | 302 | 272 | 270 | 258 | 237 | 227 | 212 |
| <b>CTN0030</b>                                |       |     |     |     |     |     |     |     |     |     |
| Increase                                      | 32    | 15  | 12  | 6   | 3   | 3   | 3   | 0   | 0   | 1   |
| Constant                                      | 195   | 213 | 219 | 221 | 222 | 214 | 207 | 216 | 213 | 210 |
| <b>CTN0051</b>                                |       |     |     |     |     |     |     |     |     |     |
| Increase                                      | 23    | 11  | 3   | 5   | 5   | 1   | 2   | 2   | 1   | 1   |
| Constant                                      | 145   | 172 | 170 | 175 | 167 | 168 | 149 | 149 | 149 | 138 |
| Increase dose if under threshold strategy, d2 |       |     |     |     |     |     |     |     |     |     |
| <b>CTN0027</b>                                |       |     |     |     |     |     |     |     |     |     |
| Increase                                      | 26    | 11  | 8   | 4   | 1   | 1   | 2   | 1   | 1   | 2   |
| Constant                                      | 413   | 432 | 351 | 337 | 272 | 268 | 262 | 243 | 227 | 219 |
| <b>CTN0030</b>                                |       |     |     |     |     |     |     |     |     |     |
| Increase                                      | 8     | 5   | 3   | 1   | 2   | 0   | 1   | 0   | 0   | 1   |
| Constant                                      | 190   | 220 | 215 | 228 | 196 | 185 | 179 | 175 | 167 | 164 |
| <b>CTN0051</b>                                |       |     |     |     |     |     |     |     |     |     |
| Increase                                      | 33    | 10  | 10  | 8   | 6   | 2   | 3   | 2   | 2   | 1   |
| Constant                                      | 92    | 118 | 130 | 134 | 129 | 131 | 120 | 118 | 116 | 107 |
| Hybrid dosing strategy, d3                    |       |     |     |     |     |     |     |     |     |     |
| <b>CTN0027</b>                                |       |     |     |     |     |     |     |     |     |     |
| Increase                                      | 99    | 38  | 28  | 16  | 4   | 3   | 4   | 3   | 3   | 3   |
| Constant                                      | 230   | 274 | 259 | 261 | 234 | 233 | 226 | 212 | 204 | 191 |
| <b>CTN0030</b>                                |       |     |     |     |     |     |     |     |     |     |
| Increase                                      | 35    | 17  | 14  | 7   | 5   | 3   | 3   | 0   | 0   | 1   |
| Constant                                      | 122   | 147 | 155 | 158 | 151 | 145 | 145 | 148 | 139 | 141 |
| <b>CTN0051</b>                                |       |     |     |     |     |     |     |     |     |     |
| Increase                                      | 48    | 17  | 13  | 11  | 9   | 3   | 5   | 4   | 3   | 2   |
| Constant                                      | 71    | 90  | 99  | 108 | 107 | 110 | 94  | 97  | 100 | 92  |

Figure A2: Estimated average treatment effects (with 95% confidence intervals), comparing dosing strategies  $d \in \{d1, d2\}$  to the hybrid strategy ( $d3$ ), among (a) patients randomized to BUP-NX and (b) patients randomized to methadone.

(a) BUP-NX

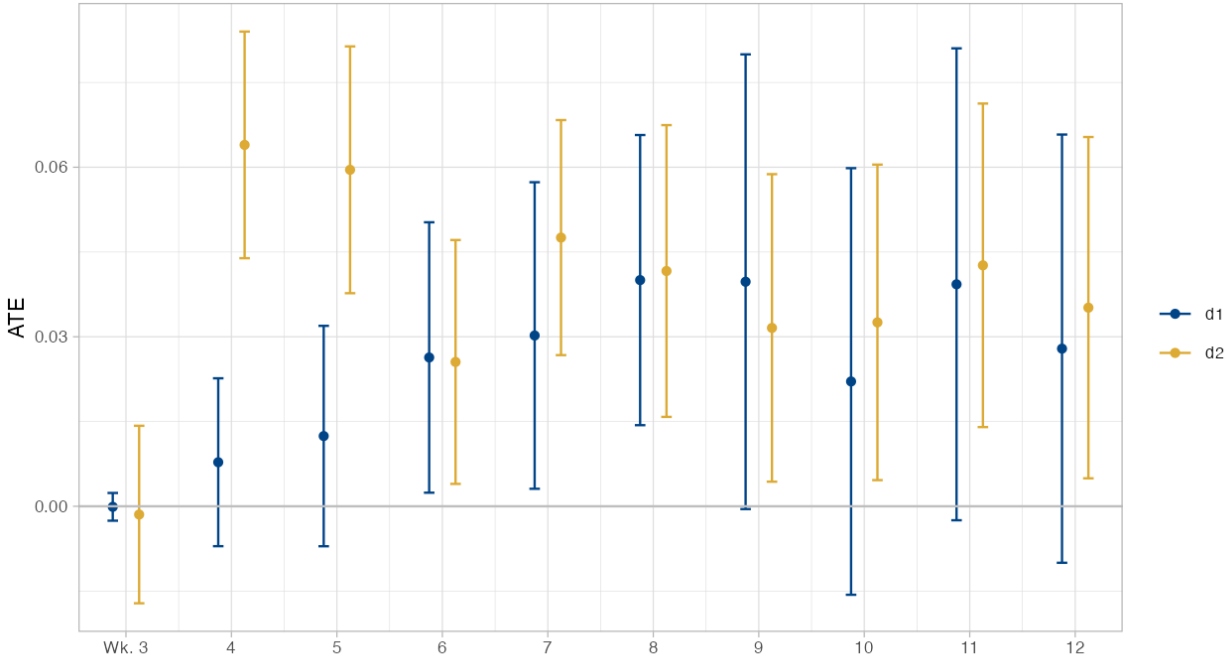

(b) Methadone

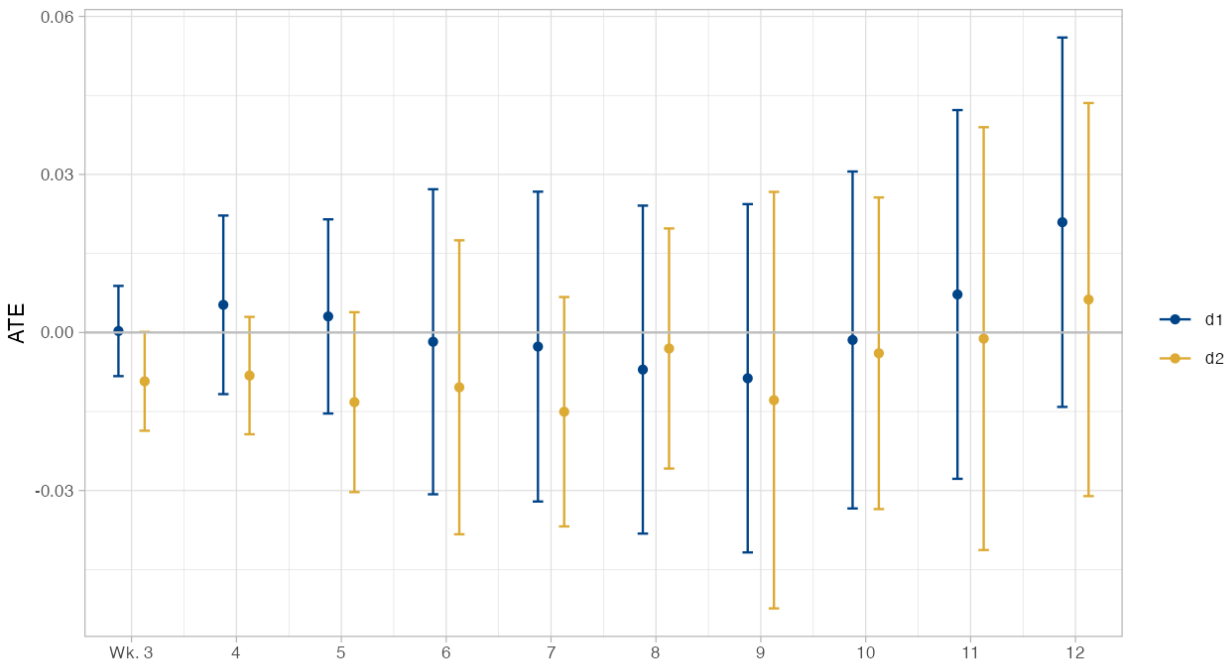

Figure A3: Estimated marginal risks of relapse and average treatment effects (with 95% confidence intervals), comparing dosing strategies  $d \in \{d1, d2, d3\}$  to the reference of constant dose ( $d4$ ), among patients randomized to BUP-NX in trial CTN0027.

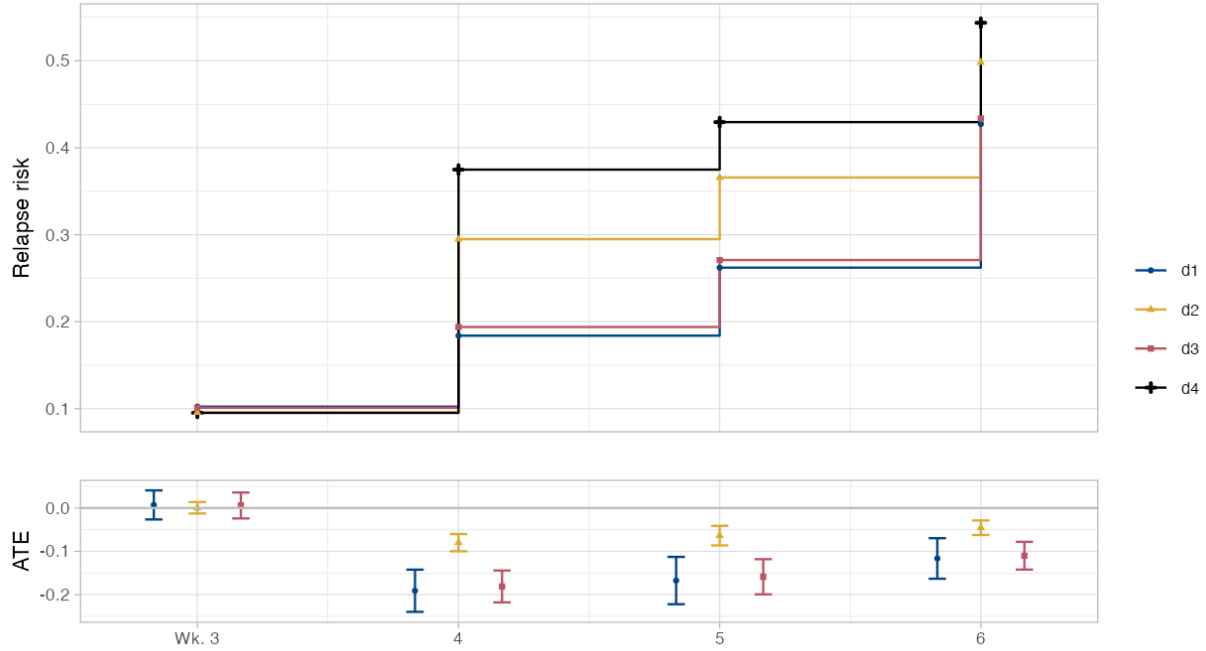

Figure A4: Estimated marginal risks of relapse and average treatment effects (with 95% confidence intervals), comparing dosing strategies  $d \in \{d1, d2, d3\}$  to the reference of constant dose ( $d4$ ), among patients randomized to BUP-NX in trial CTN0030.

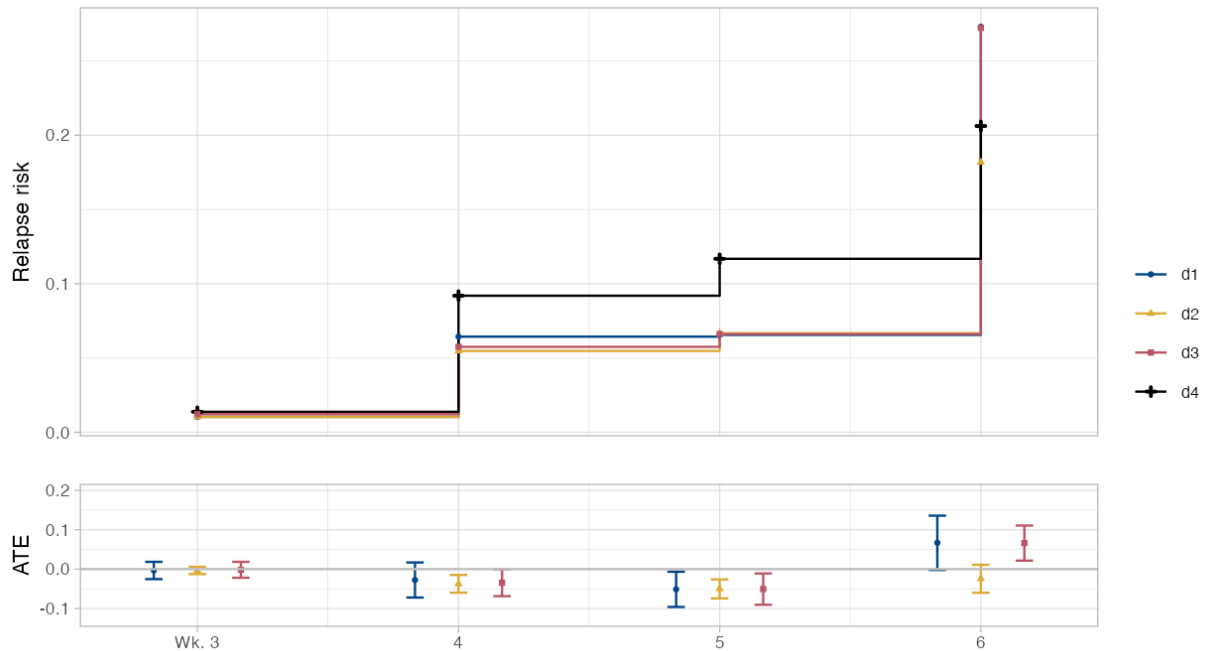



Figure A5: Estimated marginal risks of relapse and average treatment effects (with 95% confidence intervals), comparing dosing strategies  $d \in \{d1, d2, d3\}$  to the reference of constant dose ( $d4$ ), among patients randomized to BUP-NX in trial CTN0051.

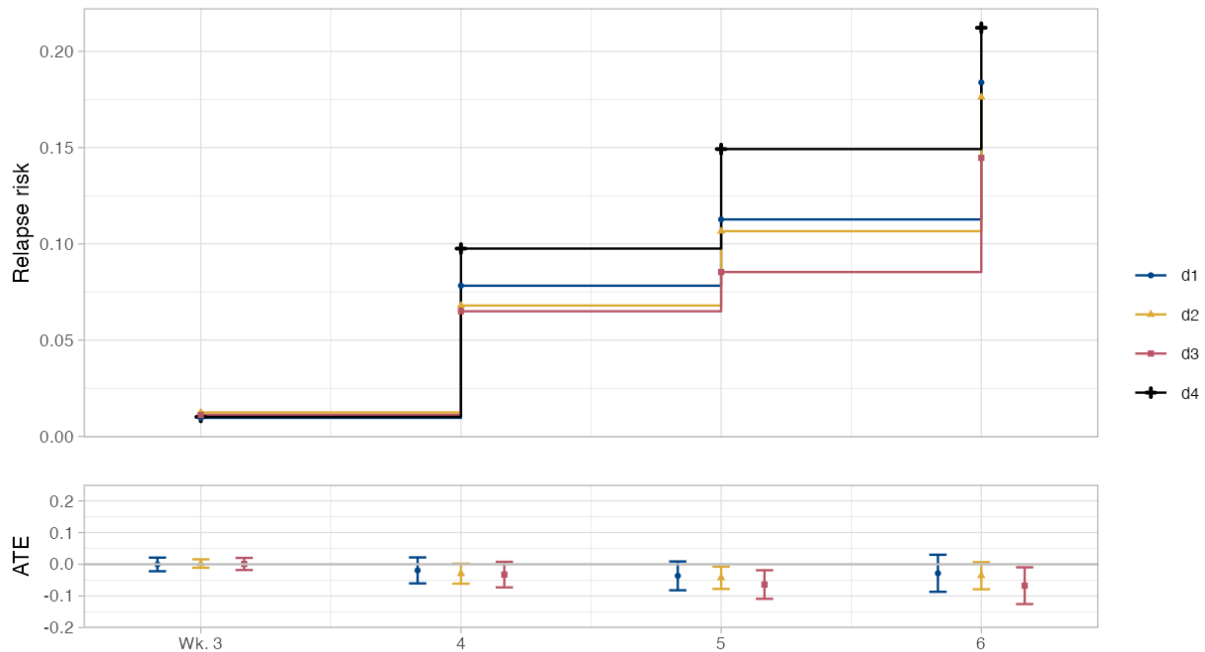

## References

- [1] Andrew J Saxon, Walter Ling, Maureen Hillhouse, Christie Thomas, Albert Hasson, Alfonso Ang, Geetha Doraimani, Gudaye Tasissa, Yuliya Lokhnygina, Jeff Leimberger, et al. Buprenorphine/naloxone and methadone effects on laboratory indices of liver health: a randomized trial. *Drug and alcohol dependence*, 128(1-2):71–76, 2013.
- [2] Jennifer S Potter, Elise N Marino, Maureen P Hillhouse, Suzanne Nielsen, Katharina Wiest, Catherine P Canamar, Judith A Martin, Alfonso Ang, Rachael Baker, Andrew J Saxon, et al. Buprenorphine/naloxone and methadone maintenance treatment outcomes for opioid analgesic, heroin, and combined users: findings from starting treatment with agonist replacement therapies (start). *Journal of Studies on Alcohol and Drugs*, 74(4):605–613, 2013.
- [3] Roger D Weiss, Jennifer Sharpe Potter, Scott E Provost, Zhen Huang, Petra Jacobs, Albert Hasson, Robert Lindblad, Hilary Smith Connery, Kristi Prather, and Walter Ling. A multi-site, two-phase, prescription opioid addiction treatment study (poats): rationale, design, and methodology. *Contemporary clinical trials*, 31(2):189–199, 2010.
- [4] Joshua D Lee, Edward V Nunes Jr, Patricia Novo, Ken Bachrach, Genie L Bailey, Snehal Bhatt, Sarah Farkas, Marc Fishman, Phoebe Gauthier, Candace C Hodgkins, et al. Comparative effectiveness of extended-release naltrexone versus buprenorphine-naloxone for opioid relapse prevention (x: Bot): a multicentre, open-label, randomised controlled trial. *The Lancet*, 391(10118):309–318, 2018.
- [5] Betty Tai, Steven Sparenborg, David Liu, and Michele Straus. The national drug abuse treat-

ment clinical trials network: forging a partnership between research knowledge and community practice. *Substance abuse and rehabilitation*, 2:21, 2011.
